# Supplementary material
Source: PubMed Central journal article supplement (PMC5248997)
Supplement: DB160484SupplementaryData.pdf [file DB160484SupplementaryData.pdf]

## SUPPLEMENTARY DATA

### **Mouse models.**

Mice were housed in a controlled environment with a 12:12-h light-dark cycle. Male mice were fed a chow (5.5% fat by weight; 5001 Purina Laboratory Rodent Diet) or HF diet (60% kcal from fat; F3282 BioServ) for 16 weeks. Studies were performed at 19 weeks of age. Body composition was assessed using a mq10 nuclear magnetic resonance analyzer (Bruker).

**Kinexus Assay.** Two hundred and fifty mg of pooled frozen 5h fasted insulin clamped liver tissue from each genotype (3 mice/genotype) was homogenized and needle sheered in 1 mL lysis buffer. The homogenate was centrifuged at 13000 rpm for 30 min at 4C. The supernatant was collected and the protein concentration was determined using the BCA protein assay. Fifty ug of lysate from each genotype was labeled with the Kinex 543 Labeling Dye and the proteins were purified using Microspin G-25 Columns. The full amount of each labeled protein sample was applied to the microarray slide. The slide was incubated in a humidity chamber in the dark on a table top shaker for 2h at room temperature. The slide was washed several times and dried in a swing-bucket bench top centrifuge. The microarray slide was shipped to Kinexus for quantification and data analysis. Signal quantification was performed using ImaGene 9.0 from BioDiscovery. Z scores were calculated by subtracting the overall average intensity of all spots within a sample from the raw intensity for each spot, and dividing it by the standard deviations of all measured intensities within each sample (1). A Z-ratio of  $\pm 1.2$  to 1.5 was considered significant.

**Mitochondrial oxygen consumption.** Mitochondria were isolated from livers of 5h fasted mice and oxygen consumption was measured in air-saturated MiR05 (pH 7.4, 30°C) with a Clark-type oxygen electrode (Oroboros Instruments Corp., Innsbruck, Austria) as previously described (2). State 2 respiration was measured in the presence of 1 mM malate and 50  $\mu$ M palmitoyl carnitine or 1 mM malate and 10 mM glutamate prior to the addition of ADP. State 3 respiration was measured upon the addition of 0.5 mM ADP. Cytochrome c (10  $\mu$ M) was added at the end of each measurement to ensure the outer mitochondrial membrane was intact.

SUPPLEMENTARY DATA

**Supplementary Table 1.** Protein and phosphoprotein microarray data from 5h fasted livers of high fat (HF) fed ILK<sup>lox/lox</sup> and ILK<sup>lox/lox</sup> Albcre mice. Each condition tested represents a pool of frozen liver homogenates from three mice. A Z ratio of  $\pm 1.2$  was considered significant. Green represents upregulation and red indicates downregulation compared to ILK<sup>lox/lox</sup> Albcre mice.

| Target Protein Name | Phospho Site | Full Target Protein Name                                               | Z-ratio |
|---------------------|--------------|------------------------------------------------------------------------|---------|
| Rb                  | S807         | Retinoblastoma-associated protein 1                                    | 3.79    |
| S6K                 | S424         | p70 ribosomal protein-serine S6 kinase                                 | 2.46    |
| Fyn                 | Pan-specific | Fyn proto-oncogene-encoded protein-tyrosine kinase                     | 2.39    |
| PKBb (Akt2)         | Pan-specific | Protein-serine kinase B beta                                           | 2.37    |
| TBK1                | Pan-specific | Serine/threonine-protein kinase TBK1                                   | 2.35    |
| Shc1                | Y349         | SH2 domain-containing transforming protein 1                           | 2.16    |
| PKBb (Akt2)         | Pan-specific | Protein-serine kinase B beta                                           | 2.15    |
| Syk                 | Y323         | Spleen protein-tyrosine kinase                                         | 2.14    |
| S6K                 | S411         | p70 ribosomal protein-serine S6 kinase                                 | 2.14    |
| MST1                | Pan-specific | Mammalian STE20-like protein-serine kinase 1 (KRS2)                    | 2.12    |
| Myc                 | S373         | Myc proto-oncogene protein                                             | 2.08    |
| PKCh                | Pan-specific | Protein kinase C eta type                                              | 1.97    |
| Gab1                | Y627         | GRB2-associated binder 1                                               | 1.94    |
| Raf1                | Pan-specific | Raf1 proto-oncogene-encoded protein-serine kinase                      | 1.92    |
| JNK1/2/3            | Pan-specific | Jun N-terminus protein-serine kinase (SAPK) 1/2/3                      | 1.83    |
| HDAC5               | S498         | Histone deacetylase 5                                                  | 1.83    |
| GSK3a               | Pan-specific | Glycogen synthase-serine kinase 3 alpha                                | 1.80    |
| MEK7 (MAP2K7)       | Pan-specific | MAPK/ERK protein-serine kinase 7 (MKK7)                                | 1.77    |
| DDIT3(CHOP)         | Pan-specific | DNA damage-inducible transcript 3 protein                              | 1.77    |
| PAK2                | Pan-specific | p21-activated kinase 2 (gamma) (serine/threonine-protein kinase PAK 2) | 1.75    |
| Smac/DIABLO         | Pan-specific | Second mitochondria-derived activator of caspase                       | 1.71    |
| IkBa                | Pan-specific | Inhibitor of NF-kappa-B alpha (MAD3)                                   | 1.69    |
| GroEL               | Pan-specific | GroEL homolog (may correspond to Hsp60)                                | 1.68    |
| FKHR                | S256         | Forkhead box protein O1                                                | 1.64    |
| MEK5 (MAP2K5)       | Pan-specific | MAPK/ERK protein-serine kinase 5 (MKK5)                                | 1.60    |
| JAK1                | Pan-specific | Janus protein-tyrosine kinase 1                                        | 1.57    |
| GATA1               | S142         | Erythroid transcription factor                                         | 1.56    |
| JNK2 (MAPK9)        | Pan-specific | Jun N-terminus protein-serine kinase (SAPK) 2                          | 1.53    |
| Tubulin             | Pan-specific | Tubulin                                                                | -1.51   |
| MEK4 (MAP2K4)       | S257+T261    | MAPK/ERK protein-serine kinase 4 (MKK4)                                | -1.52   |
| Bax                 | Pan-specific | Apoptosis regulator Bcl2-associated X protein                          | -1.53   |
| 4G10                | pTyr         | 4G10                                                                   | -1.58   |
| Catenin b1          | Pan-specific | Catenin (cadherin-associated protein) beta 1                           | -1.63   |
| PKA Cb              | S339         | cAMP-dependent protein-serine kinase catalytic subunit beta            | -1.65   |
| MLK3                | T277+S281    | Mixed-lineage protein-serine kinase 3                                  | -1.73   |
| MEK3/6 (MAP2K3/6)   | S218/S207    | MAPK/ERK protein-serine kinase 3/6 (MKK3/6)                            | -1.74   |
| BLNK                | Y84          | B-cell linker protein                                                  | -1.85   |
| WIP1                | Pan-specific | Protein phosphatase 1D                                                 | -1.90   |
| ATF2                | T69 + T71    | Activating transcription factor 2 (CRE-BP1)                            | -2.58   |
| Paxillin 1          | Y118         | Paxillin 1                                                             | -3.01   |

Protein and phosphoprotein expression in livers from 5-h fasted high fat fed ILK<sup>lox/lox</sup> and ILK<sup>lox/lox</sup>Albcre mice. A Z ratio of  $\pm 1.2$  to 1.5 is considered significant.

SUPPLEMENTARY DATA

**Supplementary Figure 1.** The members of the IPP complex PINCH and parvin are downregulated in hepatocytes isolated from  $ILK^{lox/lox}$  Albcre mice. (A) Western blot analysis for PINCH and  $\alpha$ -parvin in whole liver and hepatocyte homogenates. (B) Quantitative analysis of western blots. Integrated intensities were obtained by the Odyssey and Image J software. Data are represented as means  $\pm$  SEM;  $n=5-8$ /group. \* $p < 0.05$  compared to  $ILK^{lox/lox}$  mice.

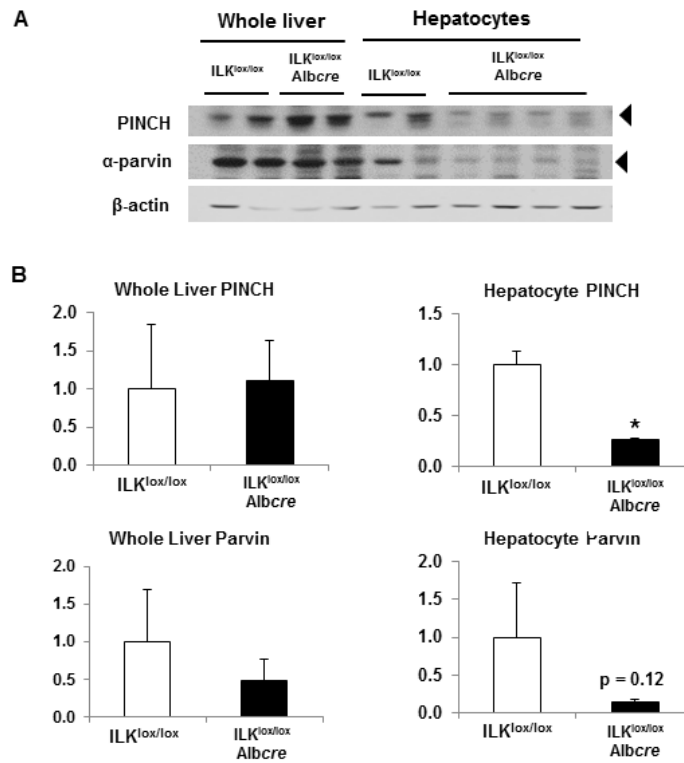

SUPPLEMENTARY DATA

**Supplementary Figure 2.** Liver wet weight is not different between high fat (HF) fed  $ILK^{lox/lox}$  and  $ILK^{lox/lox} Albcre$  mice. Data are represented as means  $\pm$  SEM; n=5-8/group.

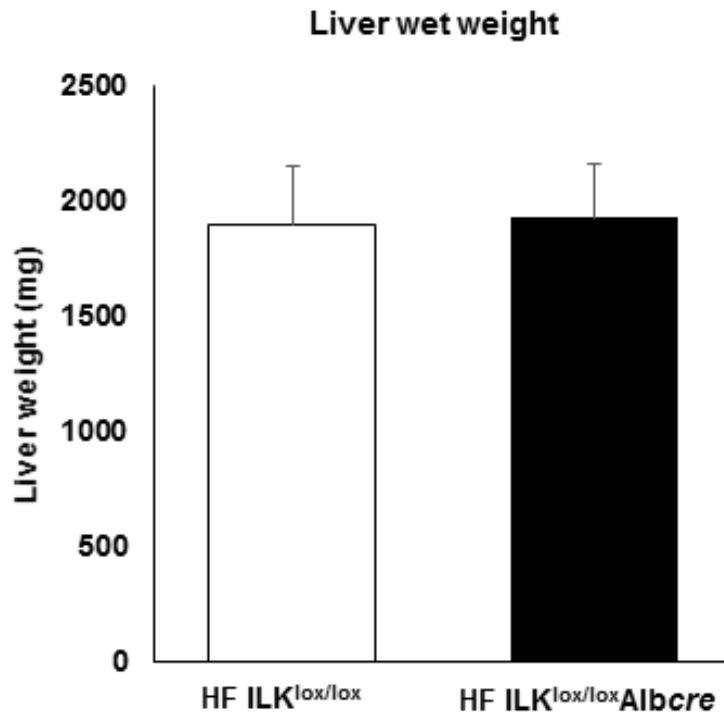

SUPPLEMENTARY DATA

**Supplementary Figure 3.** Complex I supported mitochondrial respiration is higher in high fat (HF) fed  $ILK^{lox/lox} Albcre$  mice. High resolution respirometry was performed on mitochondria isolated from livers of 5h fasted mice and assessed with the substrates glutamate and malate (A) and palmitoyl-carnitine and malate (C). The respiratory control ratio (RCR) (B and D) was determined as state 3/state 3 respiration. Data are represented as means  $\pm$  SEM;  $n=7-8/group$ .  $*p < 0.05$  compared to HF fed  $ILK^{lox/lox} Albcre$  mice.

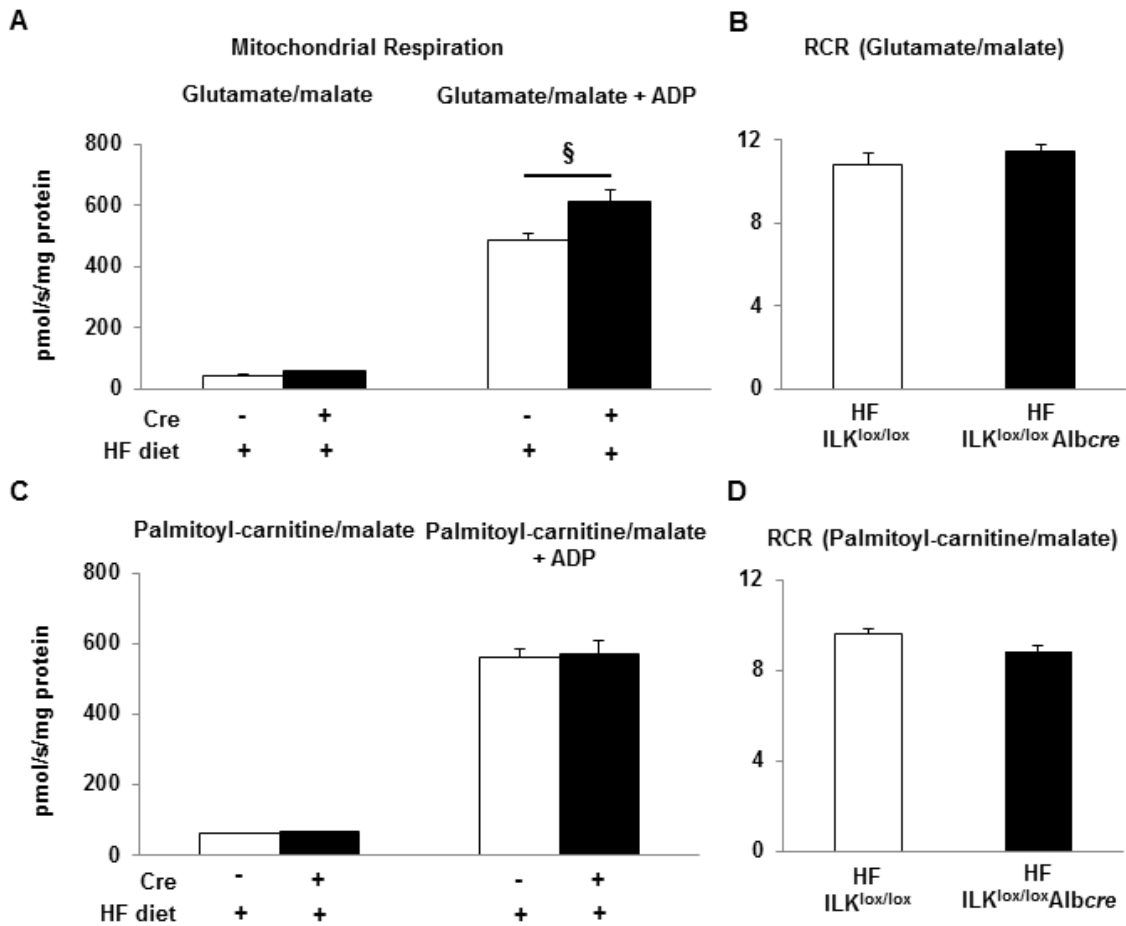

## SUPPLEMENTARY DATA

### References:

1. Cheadle C, Vawter MP, Freed WJ, Becker KG: Analysis of microarray data using *Z* score transformation. *The Journal of molecular diagnostics* : JMD 2003;5:73-81
2. Hasenour CM, Ridley DE, Hughey CC, James FD, Donahue EP, Shearer J, Viollet B, Foretz M, Wasserman DH: 5-Aminoimidazole-4-carboxamide-1-beta-D-ribofuranoside (AICAR) effect on glucose production, but not energy metabolism, is independent of hepatic AMPK in vivo. *J Biol Chem* 2014;289:5950-5959
